# Supplementary material for: Epidemiology and Surveillance of Influenza, RSV and SARS-CoV-2 in Children Admitted with Severe Acute Respiratory Infection in West Bengal, India from 2022-2023
Source: Research Square preprint supplement (doi:10.21203/rs.3.rs-6724581/v1), 2025-06-09
Supplement: Supplementary file 1 [file 235b87ea40b44de2bda9e9cf.docx]

**Supplementary material**

**Table S1**: Sociodemographic, clinical and birth characteristics of children with severe acute respiratory illness from June 27, 2022 to June 30, 2023

| **Item** | **N (%)** |
| --- | --- |
| N | 191 |
| Age in months, median (p25, p75) | 7 (3, 11) |
| **Age categorical** |  |
| <3 months | 47 (24.6) |
| 3-5 months | 35 (18.3) |
| 6-11 months | 67 (35.1) |
| 12-23 months | 41 (21.5) |
| 24 months | 1 (0.5) |
| **Gender** |  |
| Male | 112 (58.6) |
| Female | 79 (41) |
| **WAZ median (p25, p75)** | -1.56 (-3.04, -0.71) |
| **Religion** |  |
| Hindu | 139 (72.7) |
| Muslim | 52 (27) |
| **Season of presentation** |  |
| Monsoon | 37 (19.37) |
| Autumn | 51 (26.7) |
| Winter | 45 (23.6) |
| Summer | 58 (30.4) |
| **Number of children within the household**, N=190 median (p25, p75) | 1 (1, 2) |
| **Number of people at home**, N=191 median (p25, p75) | 5 (4, 7) |
| **Birth history**, N=191 |  |
| Premature birth | 26 (13.6) |
| Institutional delivery | 186 (97.4) |
| Caesarean delivery | 76 (40) |
| Birth weight, median (p25, p75), N=179 | 2.7 (2.4, 3) |
| Low birth weight, N=179 | 52 (29) |
| **Underlying conditions**, N=191 | 7 (3.6) |
| Macrocephaly | 2 (1) |
| Asthma | 1 (0.5) |
| Cardiovascular disease | 2 (1) |
| Neurological disorder | 1 (0.5) |
| Asthma and cardiovascular disease | 1 (0.5) |
| **Low weight-for-age z-score**, N=189 | 81 (43) |
| **Immunization through UIP***, N=191 | 169 (88.5) |
| **Vaccination outside of UIP by out-of-pocket payment**, N=191 | 16 (8) |
| **Tuberculosis at home**, N=191 | 2 (1) |
| **Fuel used for cooking,** N=191 |  |
| Liquefied Petroleum Gas (LPG) | 18 (10) |
| Wood | 134 (70) |
| Animal dung cakes | 2 (1) |
| Wood and animal dung cakes | 2 (1) |
| LPG and wood/animal dung cakes | 35 (18) |
| **Mother’s education** (grade), median (p25, p75),N=191 | 10 (8, 12) |
| Illiterate | 10 (5) |
| Primary (1-5) | 17 (8.9) |
| Secondary (6-10) | 98 (51.3) |
| Higher secondary and above (11 and above) | 66 (34.5) |
| **Mother’s occupation**, N=191 |  |
| Housewife | 178 (93.2) |
| Agriculture | 3 (1.57) |
| Daily wager | 9 (4.7) |
| Salaried job | 1 (0.5) |
| **Maternal vaccination history**, N=191 |  |
| COVID-19 vaccination** | 160 (83.7) |
| Influenza vaccination | 0 |
| Tdap vaccination | 0 |
| Hepatitis B vaccination | 0 |
| **Father’s education,** grade, median (p25, p75),N=190 | 4 (3, 5) |
| **Father’s occupation**,N=191 |  |
| Professional | 9 (4.7) |
| Technician and associate professional | 7 (3.7) |
| Skilled worker, shop and market sales worker | 19 (10) |
| Skilled agricultural and fishery worker | **27 (14.2)** |
| Craft and related trade worker | 16 (8.4) |
| Plant and machine operator and assembler | 23 (12) |
| Elementary occupation | **86 (45.3)** |
| Unemployed | 3 (1.6) |
| **Monthly family income,** INR, median (p25, p75),N=190 | 6177-18496 (≤6174 to 6175-18496) |
| ≤ 6174 | 59 (31) |
| 6175-18,496 | 114 (59.7) |
| 18,497–30,830 | 13 (6.8) |
| 30,831–46,128 | 4 (2.1) |
| **Family socioeconomic status,***** median (p25, p75),N=190 | Upper lower (Upper lower, Upper middle) |
| Lower | 11 (5.8) |
| Upper lower | 127 (66.8) |
| Lower middle | 37 (19.47) |
| Upper middle | 15 (7.9) |

*Universal Immunization Programme; **Maternal COVID-19 vaccinations started in India from July 2021 onwards; ***Modified Kuppuswamy Socioeconomic Status Scale 2021

*Tables S2: Illness details*

| **Item** | **N (%) or Median (p25, p75)** |
| --- | --- |
| N | 191 |
| Sickness duration on the day of admission, days, median (p25, p75) | 4 (3, 6) |
| **Chief complaint at admission** |  |
| Shortness of breath | 92 (48%) |
| Fever | 37 (19.37%) |
| Cough | 20 (10.47%) |
| Fever and cough | 13 (6.8%) |
| **Total number of symptoms** | 5 (3, 6) |
| **Vitals** |  |
| Weight, kg, median (p25, p75) | 6 (5, 7.5) |
| Temperature, ° C, median (p25, p75) | 98.2 (97.8, 98.6) |
| Pulse rate/minute, median (p25, p75) | 128 (110, 146) |
| Respiration rate/minute, median (p25, p75) | 56 (44, 66) |
| SpO2, median (p25, p75) | 95 (91.75, 96.25) |
| **Disease severity** |  |
| Lowest SpO2 noted | 92 (88, 96) |
| Highest temperature recorded, °F, median (p25, p75) | 101 (100, 102) |
| **Family members sick** | 25 (13%) |
| Mother | 7 (28%) |
| Sibling | 10 (40%) |
| Grandparent | 3 (12%) |
| Aunt | 1 (4%) |
| Father | 1 (4%) |
| Both parents | 1 (4%) |
| Mother and grandparent | 1 (4%) |
| Father and grandparent and sibling | 1 (4%) |

*Table S3: Single and Co-detections of virus and bacteria*

| **Pathogen** | **n (%)** |
| --- | --- |
| **N for RSV, Influenza and SARS-CoV-2** | **191** |
| **Single virus** | **43 (22.5)** |
| RSV | 36 (18.8) |
| Influenza | 6 (3.14) |
| SARS-CoV-2 | 1 (0.5) |
| **N for respiratory panel virus and bacteria** | **81** |
| **Single virus** | **6 (7.4)** |
| Adenovirus | 2 (2.46) |
| Rhinovirus | 1 (1.2) |
| Parainfluenza virus 1 | 1 (1.2) |
| Bocavirus | 1 (1.2) |
| Enterovirus | 1 (1.2) |
| **Single bacteria** | **6 (7.4)** |
| *Haemophilus influenzae* | 4 (5) |
| *Streptococcus pneumoniae* | 1 (1.2) |
| *Staphylococcus aureus* | 1 (1.2) |
| **Co-infections** | **37 (45.7)** |
| **Virus-virus** | **7 (8.6)** |
| SARS-CoV-2 + RSV + Rhinovirus + Adenovirus | 1 (1.2) |
| Rhinovirus + Parainfluenza virus 3 | 1 (1.2) |
| Influenza A/H3 + Influenza B | 1 (1.2) |
| Influenza A/H1N1pdm + Influenza B | 1 (1.2) |
| Influenza A/H1N1pdm + Influenza A/H3 + Influenza B | 1 (1.2) |
| Influenza A/H1N1pdm + Parainfluenza virus 1 | 1 (1.2) |
| Influenza C + Rhinovirus | 1 (1.2) |
| **Bacteria-bacteria** | **2 (2.46)** |
| *S. pneumoniae* + *H. influenzae* | 2 (2.46) |
| **Virus-bacteria** | **28 (34.6)** |
| **RSV + ≥1 bacteria** | **20 (24.7)** |
| *Streptococcus pneumoniae* + RSV | 6 (7.4) |
| *Haemophilus influenzae + RSV* | 3 (3.7) |
| *Streptococcus pneumoniae* + *H. influenzae* + RSV | 3 (3.7) |
| *Staphylococcus aureus* + RSV | 3 (3.7) |
| *Streptococcus pneumoniae* + *Bordetella spp* + RSV | 1 (1.2) |
| *Staphylococcus aureus* + *Haemophilus influenzae* + RSV | 1 (1.2) |
| *Moraxella catarrhalis* + *Streptococcus agalactiae* + *Haemophilus influenzae* + RSV | 1 (1.2) |
| *Moraxella catarrhalis* + *Staphylococcus aureus* + *S. pneumoniae* + RSV | 1 (1.2) |
| **RSV + ≥1 bacteria + virus** | **4 (5)** |
| *Chlamydia pneumoniae* + *Moraxella catarrhalis* + RSV + Rhinovirus | 1 (1.2) |
| *Streptococcus pneumoniae* + RSV + Rhinovirus | 1 (1.2) |
| *Haemophilus influenzae* + RSV + Bocavirus | 1 (1.2) |
| *Streptococcus pneumoniae* + *Haemophilus influenzae* + Parainfluenza virus 2 + RSV + Bocavirus | 1 (1.2) |
| **Other virus + ≥1 bacteria** | **5 (6.2)** |
| *Haemophilus influenzae* + Rhinovirus | 2 (2.47) |
| *Staphylococcus aureus* + Influenza A/H3N2 | 1 (1.2) |
| *Streptococcus pneumoniae* + *Haemophilus influenzae* + Parainfluenza virus 3 | 1 (1.2) |
| *Moraxella catarrhalis +* Rhinovirus | 1 (1.2) |

***Table S4****: Risk factors for respiratory syncytial virus, influenza virus, SARS-CoV-2 and rhinovirus infection*

|  | **Respiratory Syncytial Virus** | **Influenza** | **SARS-CoV-2** | **Rhinovirus** |
| --- | --- | --- | --- | --- |
|  | OR (95% CI); p | OR (95% CI); p | OR (95% CI); p | OR (95% CI); p |
| Age | 0.8 (0.54-1.2) p=0.28 | 0.46 (0.18-1.15); p=0.1 | 1.4 (0.24-8.05); p=0.7 | 0.49 (0.18-1.3); p=0.15 |
| Gender | 0.82 (0.44-1.5); p=0.54 | 1.4 (0.44-4.6); p=0.54 | - | 2.3 (0.64-8.3); p=0.2 |
| Religion | 1.1 (0.56-2.2); p=0.75 | 2 (0.62-6.77); p=0.24 | - | 0.23 (0.03-1.94); p=0.18 |
| Overcrowding (>6 persons) | 0.57 (0.3-1.1); p=0.084 | 0.6 (0.17-2.1); p=0.437 | - | 1.8 (0.5-6.47); p=0.37 |
| Premature birth | 1.17 (0.49-2.8); p=0.72 | 1.3 (0.26-6.2); p=0.76 | - | 0.4 (0.047-3.4); p=0.4 |
| Caesarean delivery | 0.76 (0.4-1.4); p=0.39 | 3.3 (0.96-11.42); p=0.058 | 1.5 (0.09-24.6); p=0.77 | 0.16 (0.2-1.3); p=0.08 |
| Low birth weight | 1.12 (0.56-2.2); p=0.74 | 0.8 (0.2-3); p=0.74 | 2.47 (0.15-40.26); p=0.52 | 1.08 (0.25-4.6); p=0.9 |
| Fuel for cooking (LPG vs solid) | 1.2 (0.41-3.6); p=0.72 | 0.27 (0.06-1.13); p=0.07 | - | - |
| Family income | 0.78 (0.48-1.3); p=0.32 | **2.6 (1.2-5.7); p=0.016** | 0.43 (0.03-5.25); p=0.51 | 1.8 (0.84-3.77); p=0.13 |
| Socioeconomic status | 0.8 (0.5-1.27); p=0.35 | 1.5 (0.7-3.2); p=0.28 | 0.46 (0.04-5.6); p=0.54 | 1.84 (0.9-3.77); p=0.095 |
| Referral case | **0.5 (0.26-0.98); p=0.043** | 1.6 (0.5-5.2); p=0.42 | - | 2.3 (0.64-8.3); p=0.2 |
| Fever | 0.55 (0.23-1.35); p=0.19 | 1.55 (0.19-12.6); p=0.68 | - | - |
| Cough | 3 (0.99-9.13); p=0.05 | 0.8 (0.16-3.9); p=0.8 | - | 1.3 (0.14-11.45); p=0.82 |
| Rhinorrhea | 0.97 (0.47-2); p=0.94 | 0.27 (0.03-2.2); p=0.225 | - | 0.6 (0.12-3); p=0.53 |
| Nasal congestion | 1.2 (0.65-2.2); p=0.56 | 1.2 (0.38-3.9); p=0.73 | 1.2 (0.07-19.8); p=0.88 | 2.5 (0.6-10.3); p=0.2 |
| Sore throat | 2.2 (0.44-11.37); p=0.336 | - | **36.8 (2-676); p=0.015** | 7.5 (0.94-60.45); p=0.057 |
| Difficult breathing | 1.7 (0.8-3.6); p=0.16 | 1.7 (0.36-8); p=0.51 | - | - |
| Fast breathing | 0.9 (0.44-1.87); p=0.78 | 1.93 (0.37-10); p=0.43 | - | 5.7 (0.66-49.5); p=0.11 |
| Sneezing | 1.5 (0.82-2.9); p=0.17 | 0.56 (0.147-2.2); p=0.4 | 1.78 (0.1-29); p=0.68 | 1.5 (0.42-5.4); p=0.53 |
| Wheezing | 1.7 (0.9-3.1); p=0.09 | 1 (0.32-3.3); p=0.97 | - | 1.75 (0.47-6.5); p=0.4 |
| Difficulty waking up | 0.9 (0.4-2.1); p=0.84 | 0.47 (0.06-3.7); p=0.47 | - | 1.17 (0.28-4.9); p=0.83 |
| Redness of eyes | 0.7 (0.07-7); p=0.77 | - | - | - |
| Decreased appetite | **2.1 (1.2-4); p=0.02** | 0.53 (0.14-2); p=0.35 | 1.66 (0.1-27); p=0.72 | 1.75 (0.47-6.5); p=0.4 |
| Decreased urine output | 1.47 (0.4-5.44); p=0.56 | 4.2 (0.8-22.7); p=0.09 | - | 1.06 (0.1-9.8); p=0.95 |
| Decreased activity | - | - | - | 6.9 (0.4-119); 0.18 |
| Vomiting or diarrhoea | 0.4 (0.13-1.3); p=0.13 | 0.64 (0.08-5.24); p=0.68 | 7.6 (0.46-126); p=0.157 | **7.5 (1.8-31); p=0.005** |
| Cyanosis | - | 5.3 (0.51-55.2); p=0.16 | - | - |
| Nebulization requirement | 7.2 (0.93-56.45); p=0.06 | - | 0.08 (0.004-1.36); p=0.08 | 0.5 (0.05-4.9); p=0.54 |
| Intravenous fluid administration | 0.98 (0.53-1.8); p=0.95 | 1.5 (0.46-5); p=0.49 | 1 (0.06-17.3); p=0.96 | 1.85 (0.44-7.7); p=0.4 |
| Mechanical ventilation | 1.4 (0.23-8.9); p=0.69 | 3.9 (0.4-38.2); p=0.24 | - | **17.25 (1.4-212); p=0.02** |
| Oxygen requirement | 0.8 (0.43-1.55); p=0.54 | 2.6 (0.8-8.5); p=0.12 | - | 1.06 (0.27-4.1); p=0.93 |
| ICU requirement | 0.47 (0.15-1.46); p=0.19 | 2.9 (0.73-11.8); p=0.129 | - | **7.1 (1.3-38.23); p=0.023** |
| Similar sickness within household | **0.25 (0.07-0.9); p=0.034** | 2.36 (0.6-9.4); p=0.22 | - | 0.7 (0.08-6.8); p=0.82 |

*Odds ratios (OR) are calculated by unadjusted logistic regression, p=<0.05 is considered significant

Values in bold indicate statistical significance
